# Supplementary material for: Proanthocyanidin Characterization, Antioxidant and Cytotoxic Activities of Three Plants Commonly Used in Traditional Medicine in Costa Rica: Petiveria alliaceae L., Phyllanthus niruri L. and Senna reticulata Willd
Source: PubMed Central journal article supplement (PMC5750626; doi:10.3390/plants6040050), 2017-10-19
Supplement: plants-06-00050-s001.pdf [file plants-06-00050-s001.pdf]

# Supplementary Material: Proanthocyanidin Characterization, Antioxidant and Cytotoxic Activities of Three Plants Commonly Used in Traditional Medicine in Costa Rica: *Petiveria alliacea* L., *Phyllanthus niruri* L. and *Senna reticulata* Willd.

Mirtha Navarro, Ileana Moreira, Elizabeth Arnaez, Silvia Quesada, Gabriela Azofeifa, Diego Alvarado and Maria Monagas

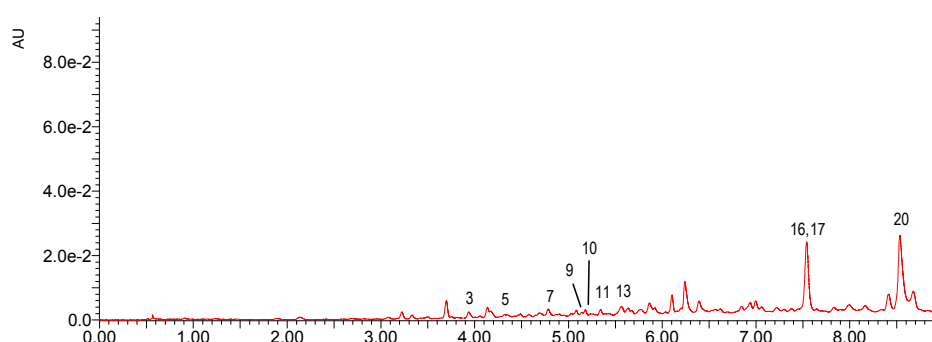

(a)

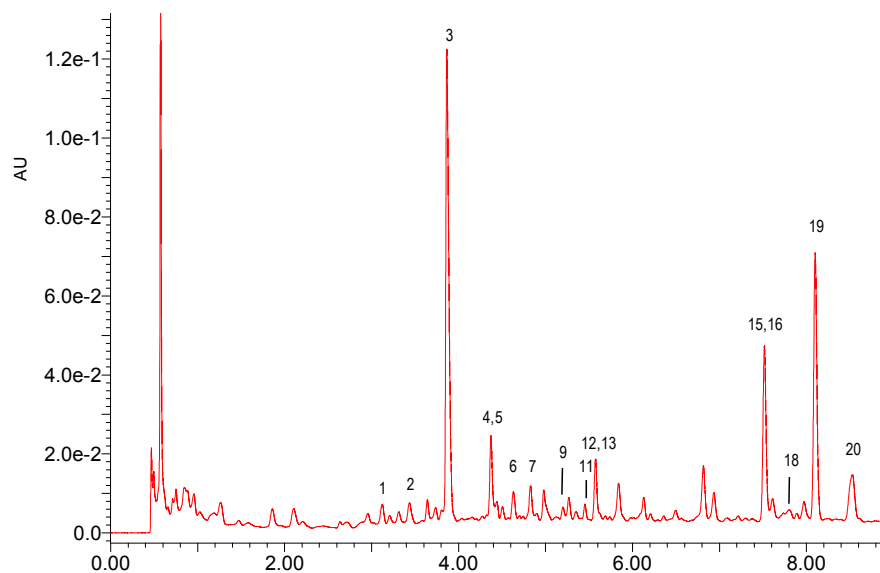

(b)

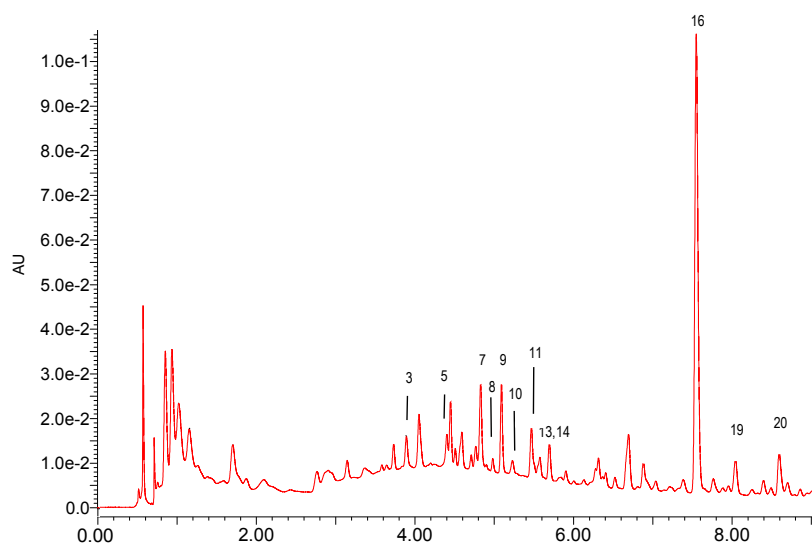

(c)

**Figure S1.** Chromatograms (UPLC-DAD) for polyphenolic compounds: (a) *P. alliicae* extract, (b) *P. niruri* extract, (c) *S. reticulata* extract.

**Table S1.** UPLC and MS/MS parameters for the identified polyphenols.

| #  | Compuesto               | Rt (min) | MRM Transition (m/z) | Collision Energy (V) | Cone Voltage (V) |
|----|-------------------------|----------|----------------------|----------------------|------------------|
| 1  | Procyanidin B3          | 3.17     | 577 > 289            | 25                   | 45               |
| 2  | Procyanidin B1          | 3.38     | 577 > 289            | 25                   | 45               |
| 3  | Gallic acid             | 3.89     | 169 > 125            | 15                   | 33               |
| 4  | Procyanidin B4          | 4.35     | 577 > 289            | 25                   | 45               |
| 5  | Protocatechuic acid     | 4.37     | 153 > 109            | 12                   | 30               |
| 6  | Procyanidin B2          | 4.62     | 577 > 289            | 25                   | 45               |
| 7  | 4-Hydroxybenzoic acid   | 4.79     | 137 > 93             | 12                   | 27               |
| 8  | Propelargonidin B       | 5.03     | 561 > 289            | 25                   | 45               |
| 9  | Caffeic acid            | 5.15     | 179 > 135            | 16                   | 35               |
| 10 | Syringic acid           | 5.20     | 197 > 182            | 12                   | 30               |
| 11 | Vanillic acid           | 5.41     | 167 > 152            | 12                   | 30               |
| 12 | Procyanidin T2          | 5.60     | 865 > 577            | 25                   | 45               |
| 13 | <i>p</i> -coumaric acid | 5.59     | 163 > 119            | 14                   | 30               |
| 14 | Propelargonidin B       | 5.63     | 561 > 289            | 25                   | 45               |
| 15 | (+)-Catechin            | 7.50     | 289 > 245            | 16                   | 40               |
| 16 | Ferulic acid            | 7.53     | 193 > 134            | 16                   | 30               |
| 17 | Benzoic acid            | 7.52     | 121 > 77             | 12                   | 27               |
| 18 | Procyanidin B5          | 7.78     | 577 > 289            | 25                   | 45               |
| 19 | (-)-Epicatechin         | 8.07     | 289 > 245            | 16                   | 40               |
| 20 | Salicylic acid          | 8.55     | 137 > 93             | 17                   | 27               |
